# Supplementary material for: Broadband-tunable spectral response of perovskite-on-paper photodetectors using halide mixing
Source: Royal Society of Chemistry journal article supplement (doi:10.1039/d2nr02963d), 2022-01-01
Supplement: d2nr02963d1.pdf [file d2nr02963d1.pdf]

## Electronic Supporting Information

### **Broadband-tunable spectral response of perovskite on paper photodetectors using halide mixing**

*Alvaro J. Magdaleno,<sup>a,b</sup> Riccardo Frisenda,<sup>c,d</sup> Ferry Prins,<sup>a,b</sup> and Andres Castellanos-Gomez<sup>c\*</sup>*

<sup>a</sup>Condensed Matter Physics Center (IFIMAC), Universidad Autonoma de Madrid, 28049 Madrid, Spain.

<sup>b</sup>Department of Condensed Matter Physics, Universidad Autonoma de Madrid, 28049 Madrid, Spain.

<sup>c</sup>Instituto de Ciencia de Materiales de Madrid (ICMM-CSIC), 28049 Madrid, Spain.

<sup>d</sup> Department of Physics, Sapienza University of Rome, 00185 Rome, Italy

## **Methods:**

### **Chemicals:**

Nano graphite powder with 400 nm (PN: MKN –CG-400) average particle size was purchased at Lowerfriction Lubricants.

MAI, MABr (Greatcell Solar Materials: MS101000-10, MS301000-10), PbI<sub>2</sub>, PbBr<sub>2</sub> and N,N-dimethylformamide (DMF) (Sigma Aldrich: 203602-50G, 398853-5G, 227056-1L).

### **Perovskite solutions**

MAPbX<sub>3</sub> (X = I and Br) solutions were prepared by mixing MAX and PbX<sub>2</sub> with stoichiometric ratios (1:1). Subsequently, the precursor salts were dissolved in DMF by stirring at room temperature during 2 h approximately. The MAPbI<sub>3</sub> and MAPbBr<sub>3</sub> stock solutions were mixed in a (1-x)/x ratio to obtain the final solutions of MAPb(I<sub>1-x</sub>Br<sub>x</sub>)<sub>3</sub> (x = 0, 0.25, 0.5, 0.75, 1). All solutions were 1.67 M concentration and were prepared and kept in a N<sub>2</sub>-filled glovebox.

### **Device preparation**

#### **a) Printing graphite contacts**

The graphite contacts were printed applying the all-dry abrasion-induced deposition method. It is based on the rubbing of the graphite (or other van der Waals material) against the paper. The abrasion breaks the interlayer forces of the graphite and creates a film of interconnected platelets that covers the paper substrate. The rubbing was applied on graphite powder with a cotton swab on general copy paper.<sup>1,2</sup> See schematic of the process in Figure S1.

#### **b) Drop casting perovskite solution:**

The perovskite was deposited by drop casting 100 μL of the desired MAPb(I<sub>1-x</sub>Br<sub>x</sub>)<sub>3</sub> (x = 0, 0.25, 0.5, 0.75, 1) solution on the area between the graphite contacts (see Fig 1.a.2-3). The device was dried at 60°C during 1.5 h inside of a N<sub>2</sub>-filled glovebox. During the first 25 min, the paper substrate was held with two microscope slides (1 mm thick) on the

borders, to avoid leakage of the perovskite solution from the contact of the paper with the hotplate. After 25 min, the paper substrate was placed in direct contact with the hotplate. After 50 min, the device was kept facing down to ensure the drying of the solution on the back side of the device. After 1 h 15 min it was flipped again to the initial position and finally left drying until 1 h 30 min (see Table S1).

| Time (min) | Action                                                                                                                                                                                   |
|------------|------------------------------------------------------------------------------------------------------------------------------------------------------------------------------------------|
| 0          | Placing paper substrate on hotplate at 60°C.<br>Holding the device with a 1 mm thick glass slide on each side.<br>Adding slowly 100 $\mu$ L of perovskite solution between the contacts. |
| 25         | Leave the sample in direct contact with the hotplate                                                                                                                                     |
| 50         | Flip the sample, placing the top part in contact with the hotplate                                                                                                                       |
| 75         | Flip the sample again to the initial position                                                                                                                                            |
| 90         | Take the sample out of the hotplate                                                                                                                                                      |

**TableS1.** Steps for the development of the perovskite-on-paper devices.

### **Transmission and photoluminescence (PL) measurements.**

For these measurements we deposited the perovskite solutions on paper without graphite and let the sample dry following the same steps as described in Table S1. For transmission measurements we used a Halogen Lamp (LHS-H100C-1) light source and the light transmitted by the resulting samples was recorded using an imaging spectrograph (Princeton Instruments, SpectraPro HRS-300, ProEM HS 1024BX3). For the PL measurements we used a pulsed laser diode ( $\lambda_{\text{ex}} = 405$  nm, PicoQuant LDH-D-C-405, PDL 800-D) with a 40 MHz laser repetition rate and a laser fluence of 500  $\text{kJ cm}^{-2}$ . We recorded the resulting PL spectra with the previously mentioned spectrograph. A pulsed laser source was chosen to reduce light induced phase segregation.<sup>3</sup>

| Material                                                    | Electrodes                 | Responsivity (mA/W) | $I_{ON}/I_{OFF}$  | $t_{ON}/t_{OFF}$ (ms) | Reference  |
|-------------------------------------------------------------|----------------------------|---------------------|-------------------|-----------------------|------------|
| CsPbBr <sub>3</sub> microcrystals/paper                     | Graphite-pencil-drawn      | 2100 @9V            | $\sim 10^3$       | 0.25 / 0.45           | 4          |
| MAPbBr <sub>3</sub> /paper                                  | Au electrodes              | 1300 @1V            | $10^4$            | 11 / 21               | 5          |
| MA <sub>0.6</sub> FA <sub>0.4</sub> PbI <sub>3</sub> /paper | Cu/Cr/Au                   | 270 @5V             | -                 | -                     | 6          |
| 2D CsPbBr <sub>3</sub> -MXene/paper                         | MXene                      | 44.9 @10V           | $2.3 \times 10^3$ | 48 / 18               | 7          |
| Origami MAPbI <sub>3</sub> /paper                           | Graphite-pencil-drawn      | 4.4 @5V             | 32                | < 10 / < 10           | 8          |
| MAPbBr <sub>3</sub> /paper                                  | Graphite, all-dry abrasion | 423 @30V            | 16                | 77 / 113              | This study |
| MAPbBr <sub>3</sub> /paper                                  | Graphite, all-dry abrasion | 0.57 @1V            | 3.26              | 130 / 240             | This study |

**Table S2.** Device performances of the reported perovskite-on-paper devices.

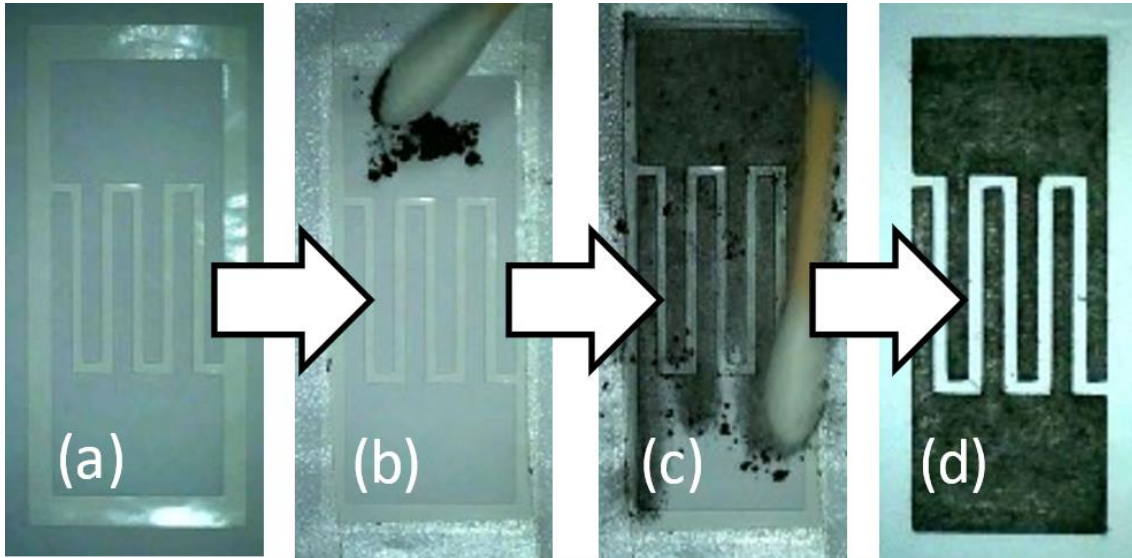

**Fig. S1.** Preparation of graphite contacts on paper. (a) Copy paper with a vinyl stencil mask with device layout. (b-c) Deposition of graphite powder and rubbing until complete covering of the mask. (d) Resulting graphite on paper substrate ready for the next steps of the device preparation.

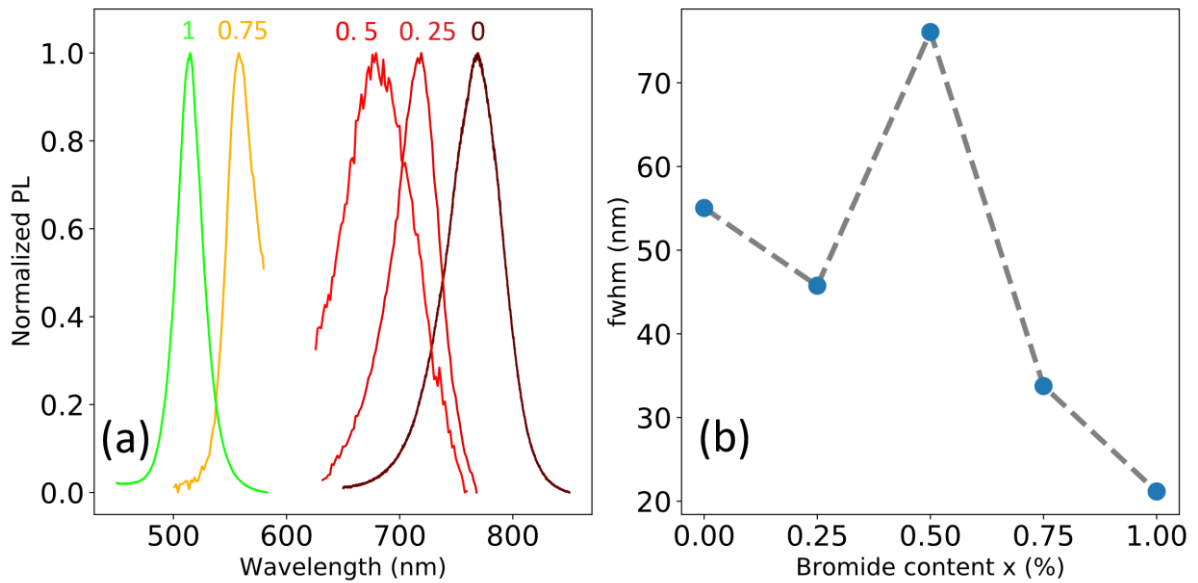

**Fig. S2.** (a) Measured PL spectra of each perovskite composition, there is observed a clear bandgap variation. (b) Full width at half maximum (fwhm) of each PL spectrum vs bromide content.

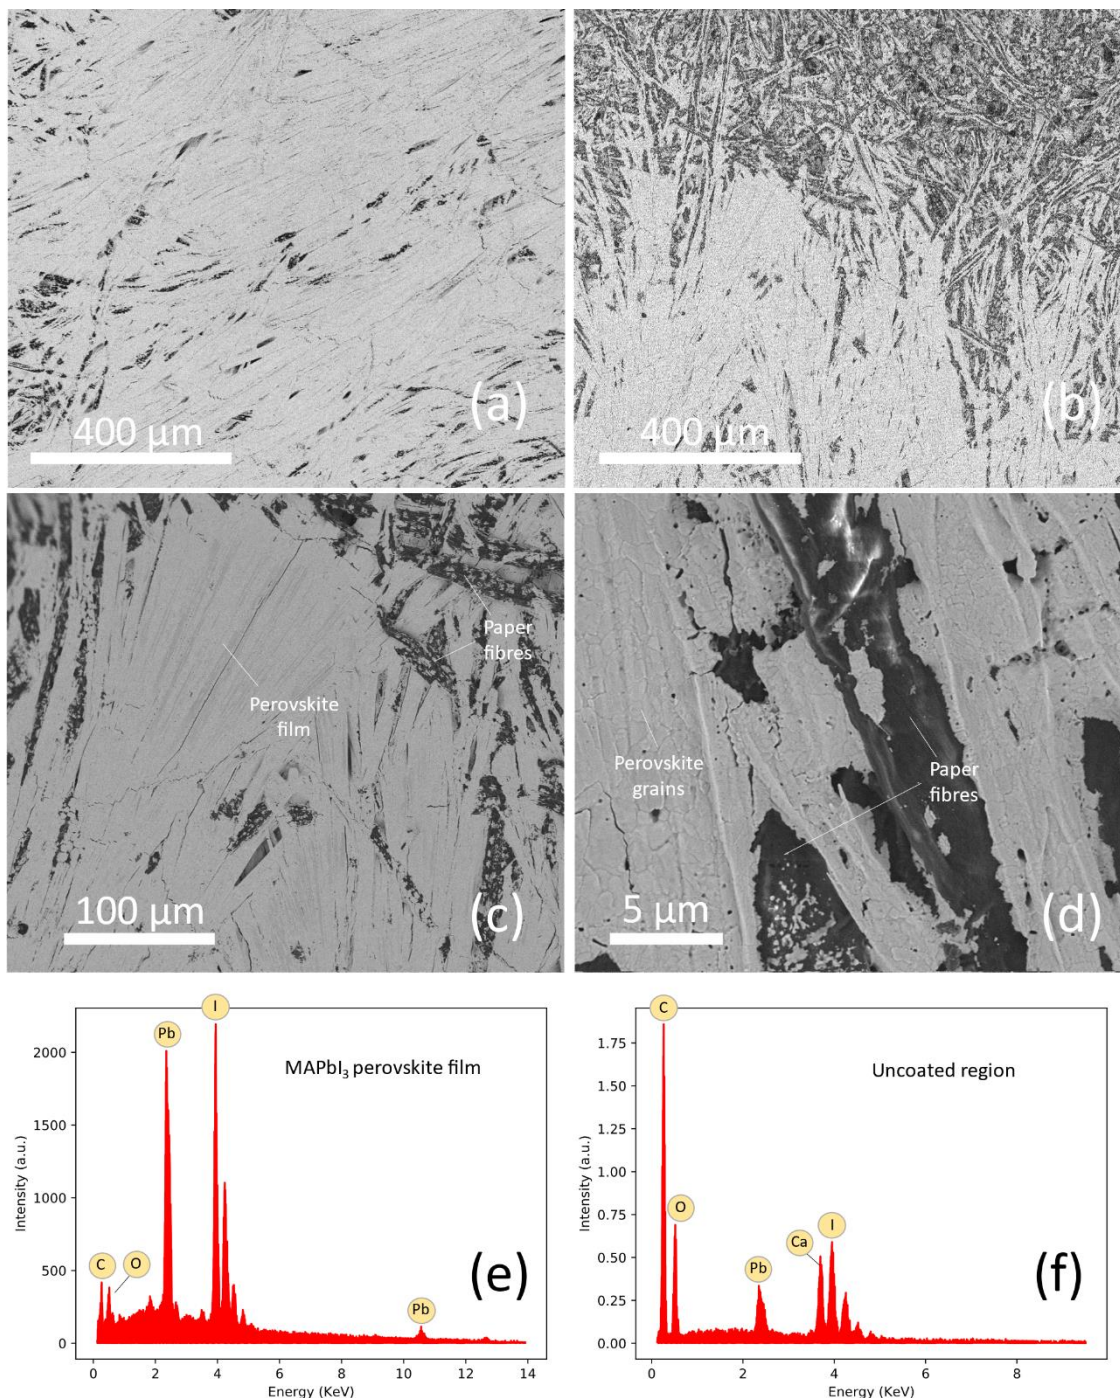

**Fig. S3.** SEM images and EDX results of MAPbI<sub>3</sub> perovskite-on-paper device surface. (a) Region covered by a homogeneous and mostly continuous perovskite film. (b) Place with a more predominant of uncoated paper fibres. (c-d) Zooming in the devices surface for a more detailed observation of the perovskite film and paper fibres. EDX results from the regions denoted in images (c) and (d) confirm the chemical compositions of MAPbI<sub>3</sub> (e) and of copy paper (f).

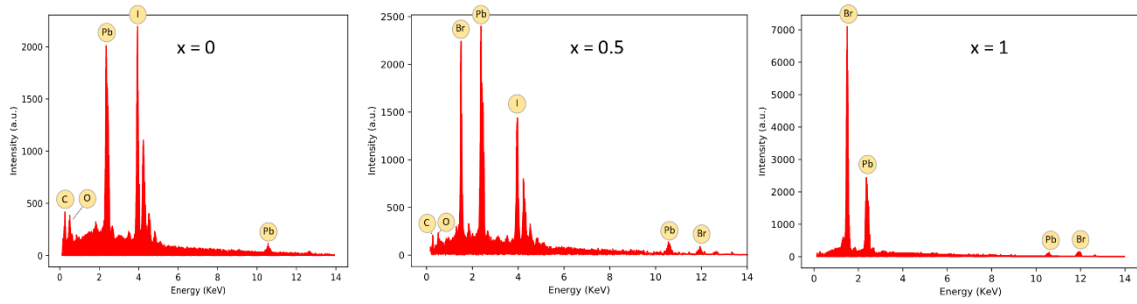

**Fig. S4.** EDX results of  $x = 0, 0.5$  and  $1$  samples.

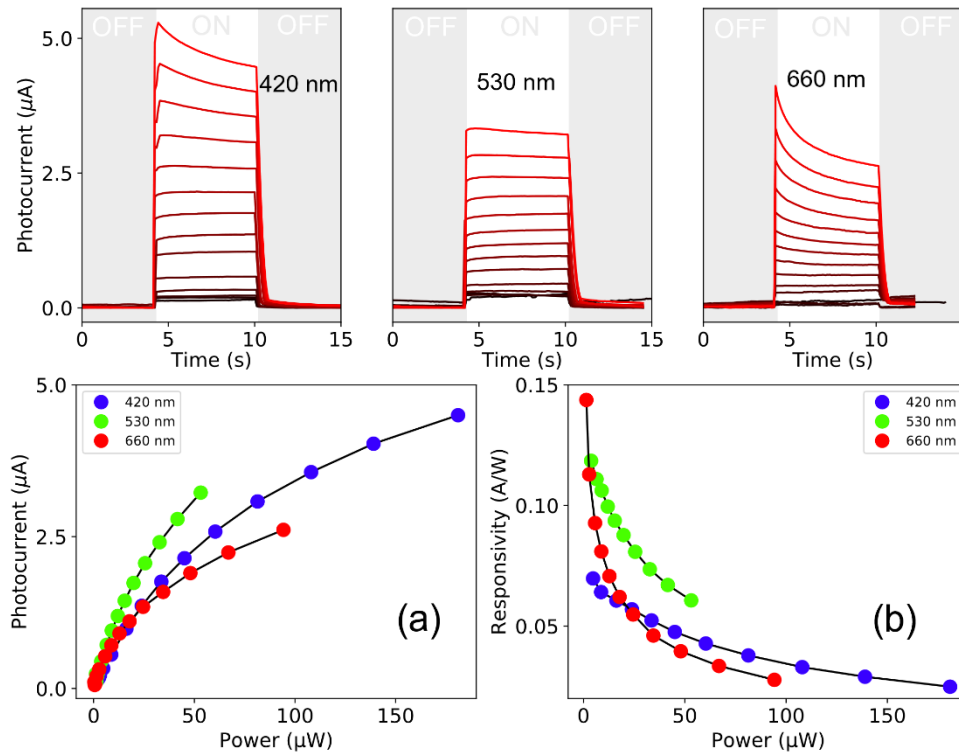

**Fig. S5.** MAPbI<sub>3</sub> device. Photocurrents generated at increased illumination intensities when exciting with  $\lambda_{LED} = 420, 530$  and  $660$  nm. (a) and (b) Photocurrent and responsivity dependence on the illumination intensities for the different  $\lambda_{LED}$ .

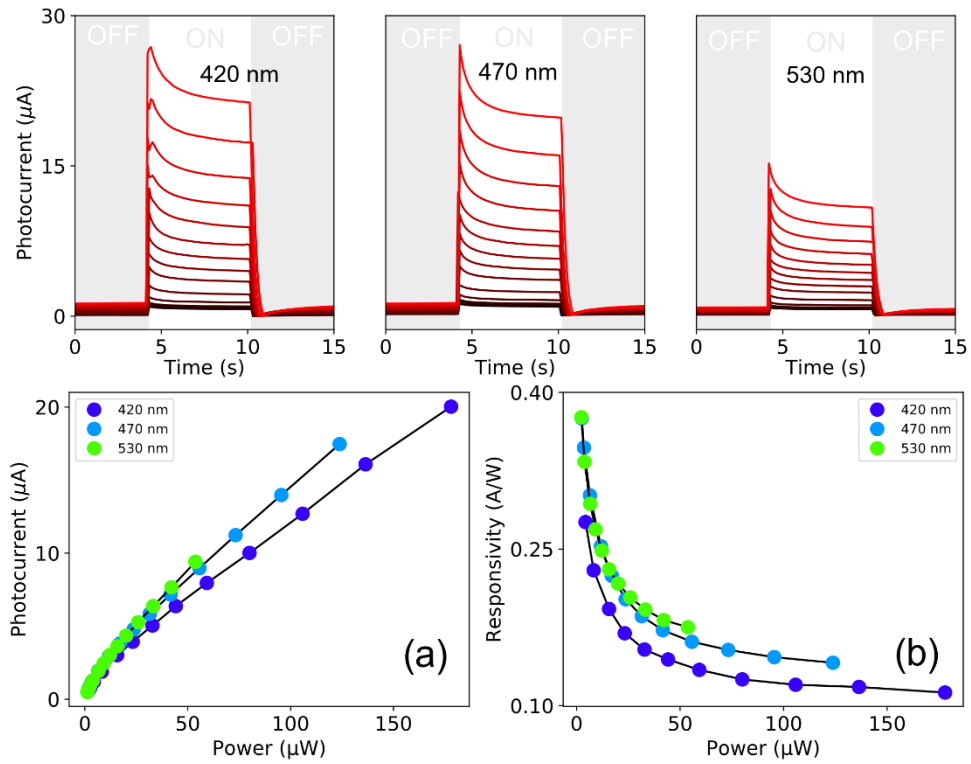

**Fig. S6.** MAPbBr<sub>3</sub> device. Photocurrents generated at increased illumination intensities when exciting with  $\lambda_{\text{LED}} = 420, 470$  and  $530$  nm. (a) and (b) Photocurrent and responsivity dependence on the illumination intensities for the different  $\lambda_{\text{LED}}$ .



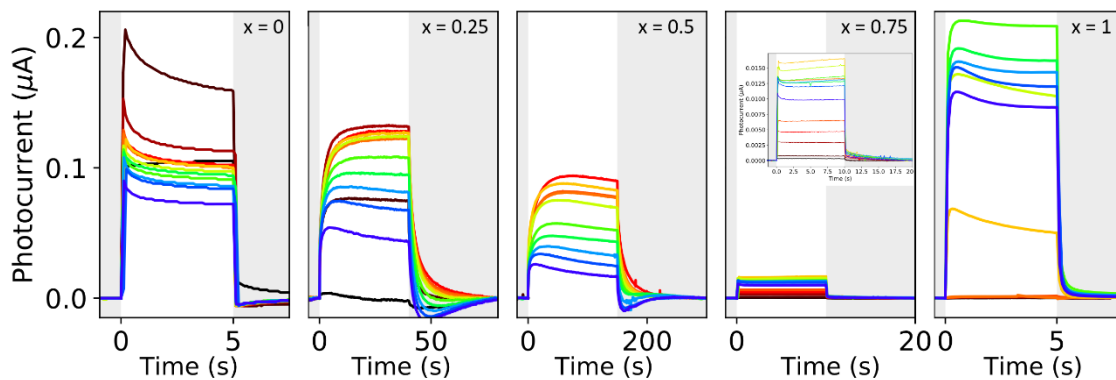

**Fig. S7.** Photocurrents generated on the  $x = 0, 0.25, 0.5, 0.75$  and  $1$  samples when illuminating with the different LEDs. Each colour depicted is the associated to the corresponding of the incident LED light. Inset:  $x = 0.75$  photocurrents zoomed in.

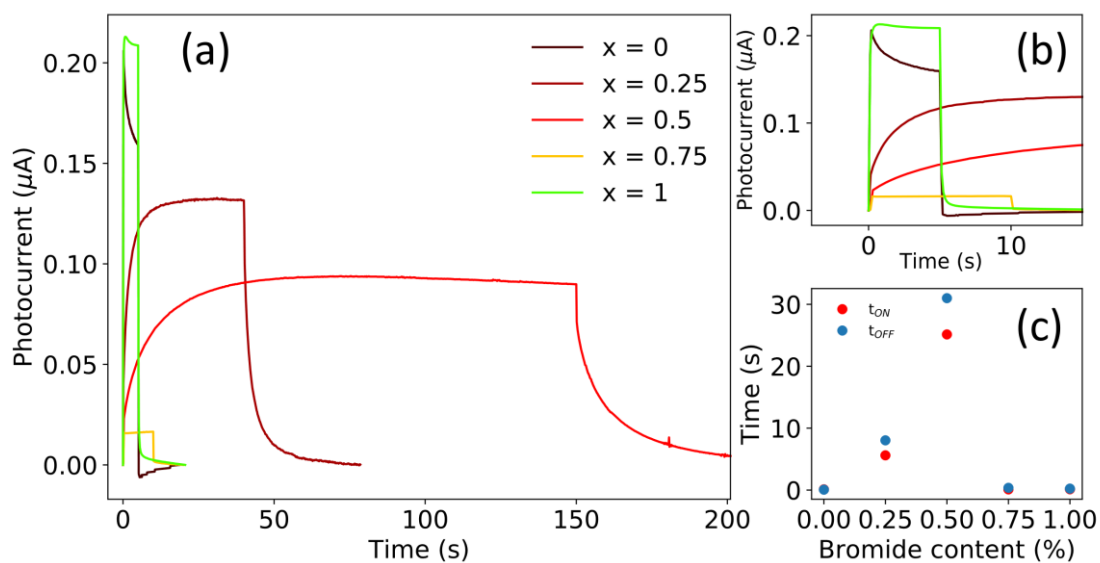

**Fig. S8.** (a) Maximum photocurrents of each device, each color depicts the incident LED color. All measurements were at illumination intensity of  $0.365 \text{ mW}$  ( $5 \mu\text{W}/\text{mm}^2$ ) and the bias voltage of operation of  $1 \text{ V}$ . (b) Zooming in the initial times of the device response. (c) the rise ( $t_{ON}$ ) and decay ( $t_{OFF}$ ) times of each device.

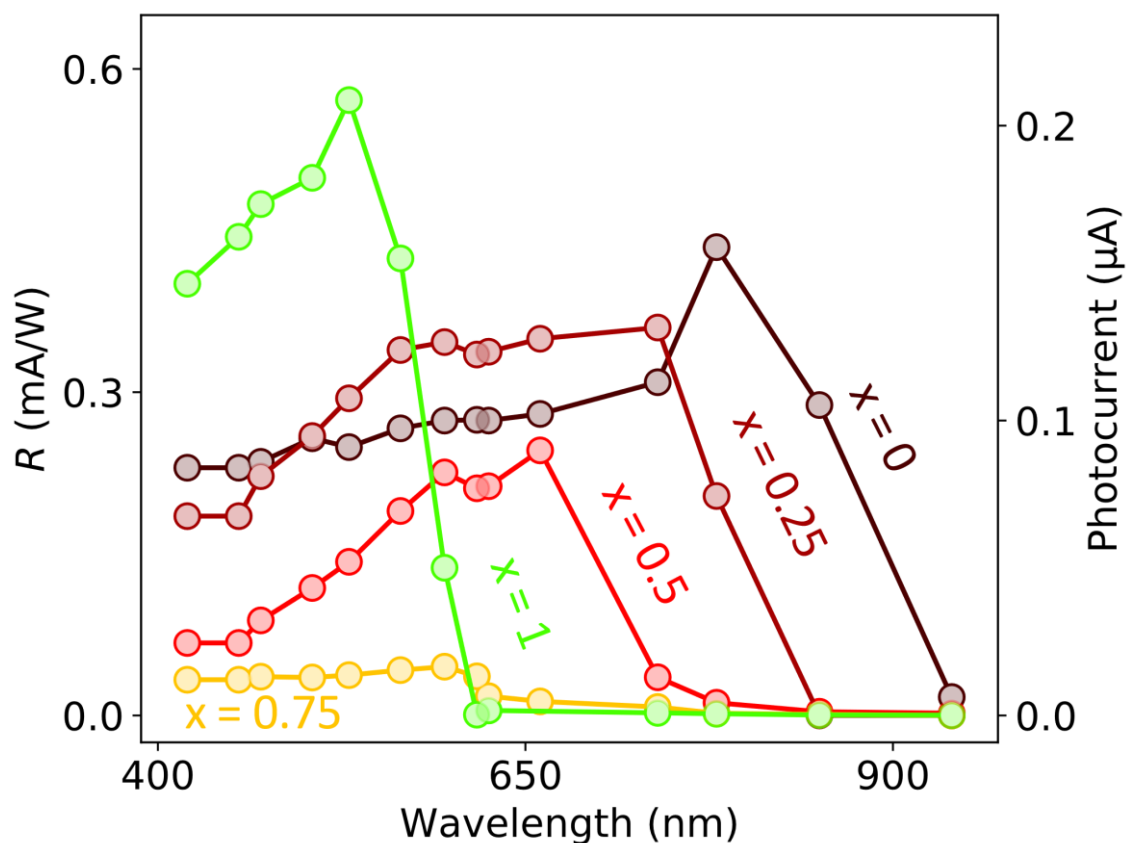

**Fig. S9.** Responsivities and photocurrents of the different devices when exposed to LED lights of different wavelengths at a constant illumination intensity of 0.365 mW ( $5 \mu\text{W}/\text{mm}^2$ ) and operation voltage of 1 V. The depicted colours are related to the maximum  $R$  wavelength positions.

## References

- 1 W. Zhang, Q. Zhao, C. Munuera, M. Lee, E. Flores, J. E. F. Rodrigues, J. R. Ares, C. Sanchez, J. Gainza, H. S. J. van der Zant, J. A. Alonso, I. J. Ferrer, T. Wang, R. Frisenda and A. Castellanos-Gomez, *Appl. Mater. Today*, 2021, **23**, 101012.
- 2 M. Lee, A. Mazaheri, H. S. J. Van Der Zant, R. Frisenda and A. Castellanos-Gomez, *Nanoscale*, 2020, **12**, 22091–22096.
- 3 E. T. Hoke, D. J. Slotcavage, E. R. Dohner, A. R. Bowring, H. I. Karunadasa and M. D. McGehee, *Chem. Sci.*, 2015, **6**, 613–617.

- 4 F. Cao, D. Yu, X. Li, Y. Zhu, Z. Sun, Y. Shen, Y. Wu, Y. Wei and H. Zeng, *J. Mater. Chem. C*, 2017, **5**, 7441–7445.
- 5 S. X. Li, X. L. Xu, Y. Yang, Y. S. Xu, Y. Xu and H. Xia, *ACS Appl. Mater. Interfaces*, 2021, **13**, 31919–31927.
- 6 A. Maity, A. K. Raychaudhuri and B. Ghosh, *J. Phys. Chem. C*, 2021, **125**, 10646–10652.
- 7 W. Deng, H. Huang, H. Jin, W. Li, X. Chu, D. Xiong, W. Yan, F. Chun, M. Xie, C. Luo, L. Jin, C. Liu, H. Zhang, W. Deng and W. Yang, *Adv. Opt. Mater.*, 2019, **7**, 1801521.
- 8 H. Fang, J. Li, J. Ding, Y. Sun, Q. Li, J. L. Sun, L. Wang and Q. Yan, *ACS Appl. Mater. Interfaces*, 2017, **9**, 10921–10928.
